# Supplementary material for: Combined absence of TRP53 target genes ZMAT3, PUMA and p21 cause a high incidence of cancer in mice
Source: PubMed Central journal article supplement (PMC10850490; doi:10.1038/s41418-023-01250-w), 2023-12-18
Supplement: 41418_2023_1250_MOESM5_ESM.pdf [file 41418_2023_1250_MOESM5_ESM.pdf]

# SUPP. FIGURE 4

**A** Thymocytes  
-> live -> single cells

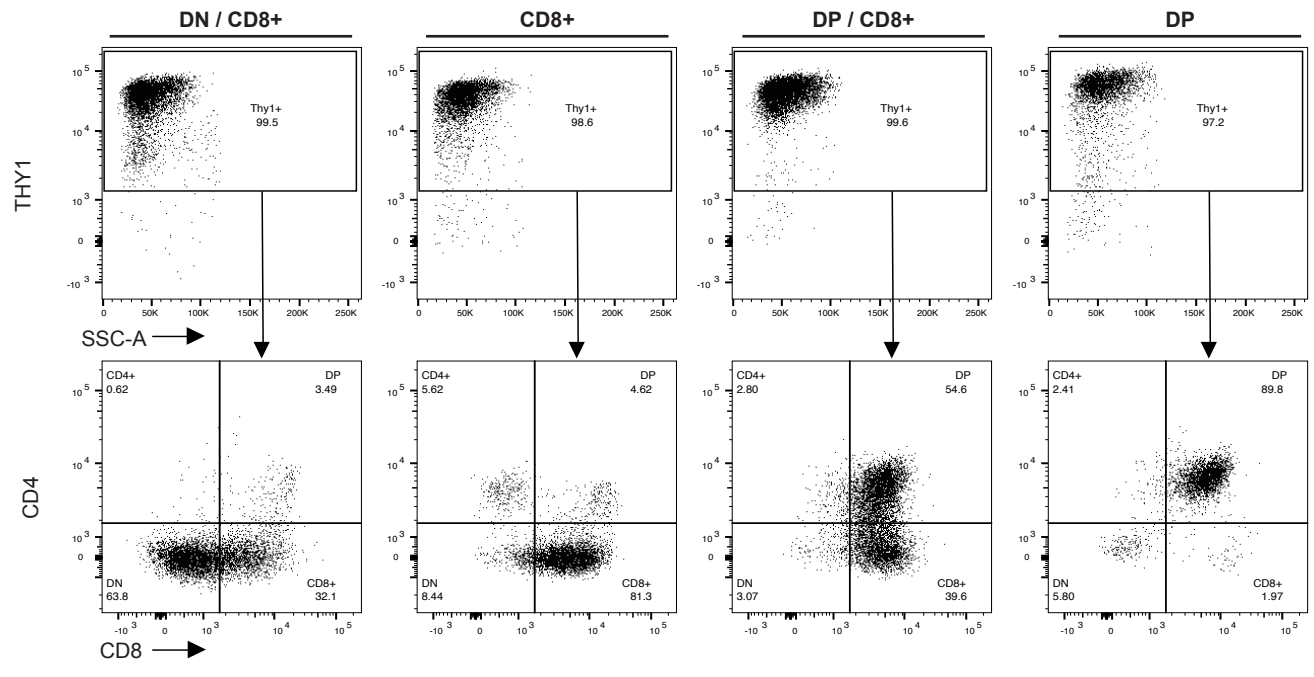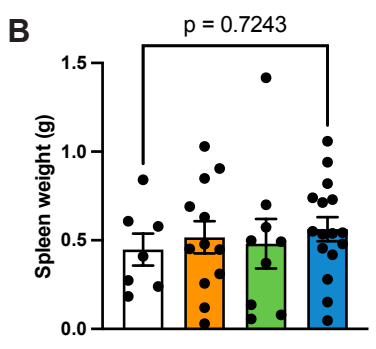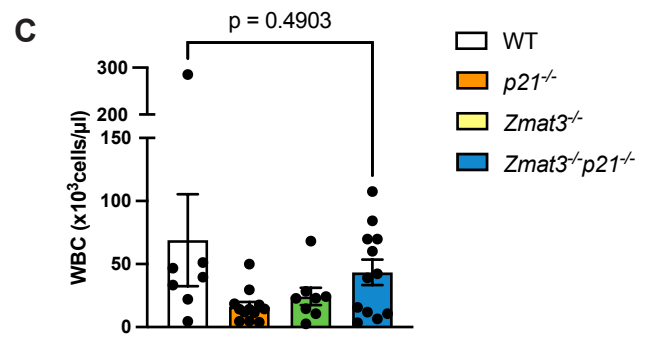

WT  
 *p21*<sup>-/-</sup>  
 *Zmat3*<sup>-/-</sup>  
 *Zmat3*<sup>-/-</sup>*p21*<sup>-/-</sup>
