# Supplementary material for: Combined absence of TRP53 target genes ZMAT3, PUMA and p21 cause a high incidence of cancer in mice
Source: PubMed Central journal article supplement (PMC10850490; doi:10.1038/s41418-023-01250-w), 2023-12-18

Premalignant mice from  
Zmat3a/Puma/p21/DEL  
Colony : Blot 1

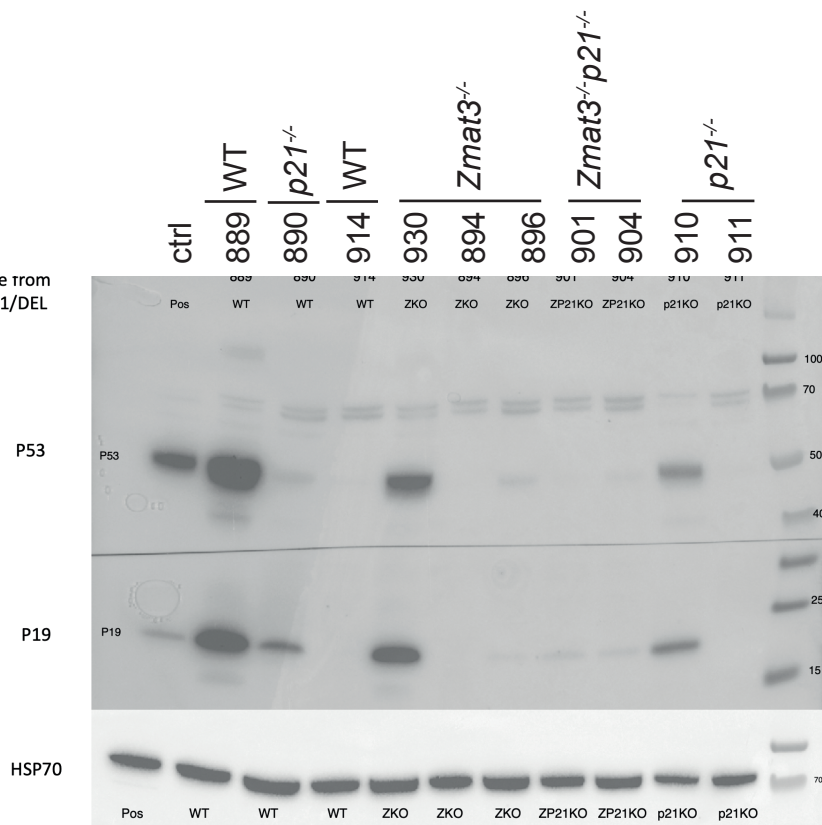

Premalignant mice from  
Zmat3a/Puma/p21/DEL  
Colony : Blot 2

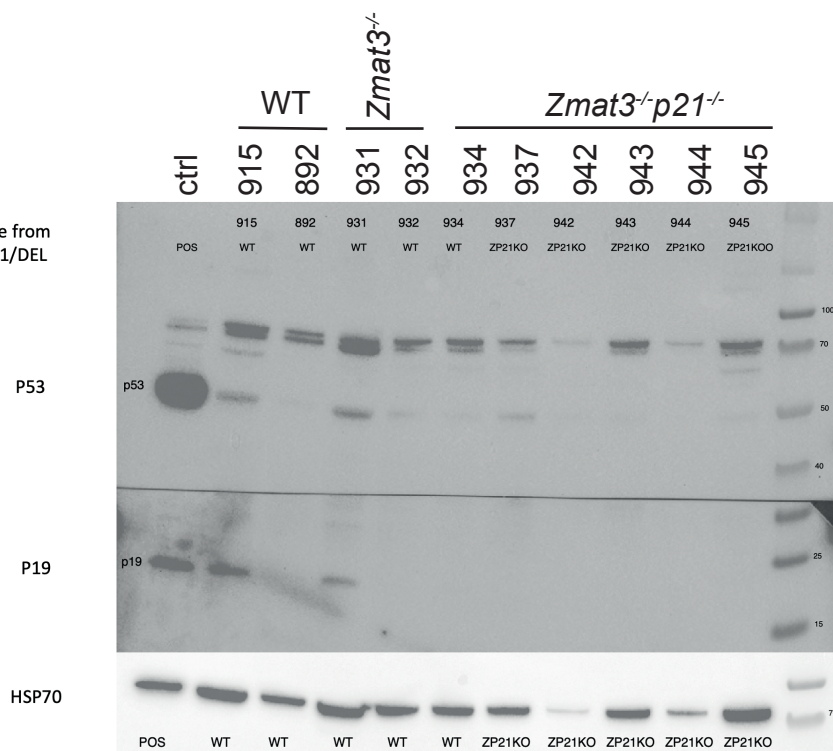

Supplement: 41418_2023_1250_MOESM9_ESM.pdf [file 41418_2023_1250_MOESM9_ESM.pdf]
